# Supplementary material for: Heterologous Expression of CFL1 Confers Flocculating Ability to Cutaneotrichosporon oleaginosus Lipid-Rich Cells
Source: MDPI journal article supplement (doi:10.3390/jof8121293), 2022-12-11
Supplement: s1 [file s1]

Figure S1: Agarose gel of PCR products generated by using Cfl1\_for and Cfl1\_rev specific primers on DNA of clones obtained by ATCC20509 transformation using cfl1PT\_hy plasmid. M: marker, ctr+: cfl1PT\_hy plasmid.

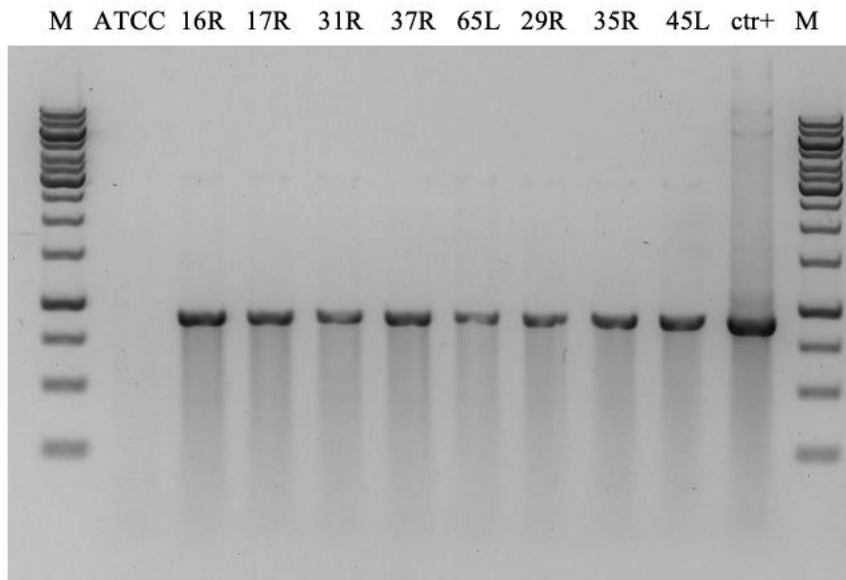

Figure S2: Agarose gel of PCR products generated by using Cfl1\_for and Cfl1\_rev specific primers on cDNA (synthesized from mRNA) of clones obtained by ATCC20509 transformation using cfl1PT\_hy plasmid. M: marker, ctr+: cfl1PT\_hy plasmid.

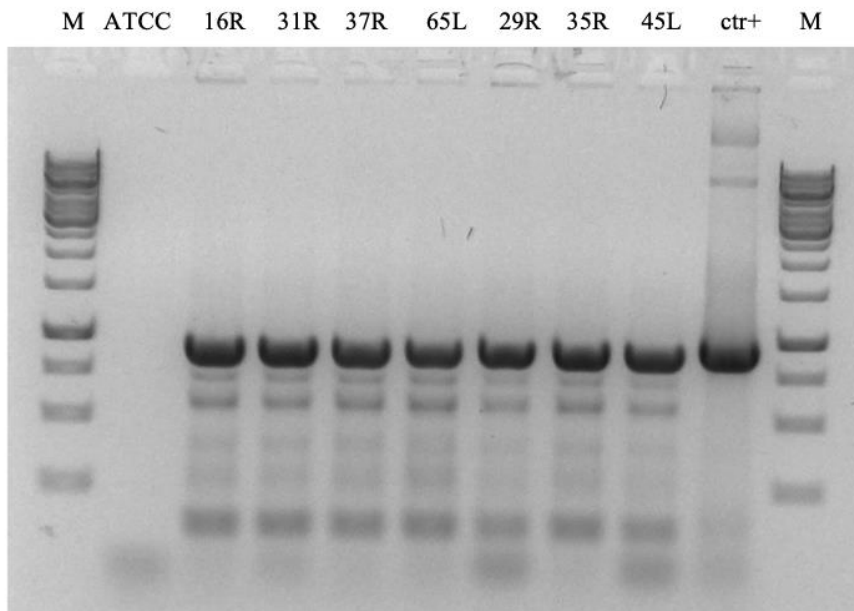

Table S1: Primer sequences employed for cfl1PT\_hy assembly and mutant screening.

| Primer             | Sequence 5'-3'               |
|--------------------|------------------------------|
| hygr2_for          | ATGAAGAAGCCCGAGCTCACCG       |
| hygr2_rev          | CGCTATCCGCGAGGACCTCG         |
| Cfl1PT_HindIII_rev | tattAAGCTTCGCCCTCGATCAAGC    |
| Cfl1PT_BcuI_for    | atgtACTAGTTTGCGGCCGCTTTTCGAC |
| cfl1_for           | gctcgttaccaacatctttgc        |
| cfl1_rev           | cactgggtgccattgagacg         |
| SEQ3               | CGCTCAAGTACTCCCTG            |
| SEQ4               | GGTTGGTGGTATTCCGC            |
| SEQ5               | GGCAGATGATGTCGAGG            |
| CECK2              | CCGAAGGTGTCGTTGGGTGCGCCG     |
